# Supplementary material for: Atomic-scale investigation on the ultra-large bending behaviours of layered sodium titanate nanowires
Source: Royal Society of Chemistry journal article supplement (doi:10.1039/c9nr02082a), 2019-01-01
Supplement: c9nr02082a1.pdf [file c9nr02082a1.pdf]

### Supporting Information

Atomic-Scale Investigation on the Ultra-large Bending Behaviours of Layered Sodium Titanate Nanowires

*Qiong Liu, Haifei Zhan, Huaiyong Zhu, Ziqi Sun, John Bell, Arixin Bo\* and Yuantong Gu\**

School of Chemistry, Physics and Mechanical Engineering, Queensland University of Technology, GPO Box 2434, 4001, Brisbane, QLD, Australia.

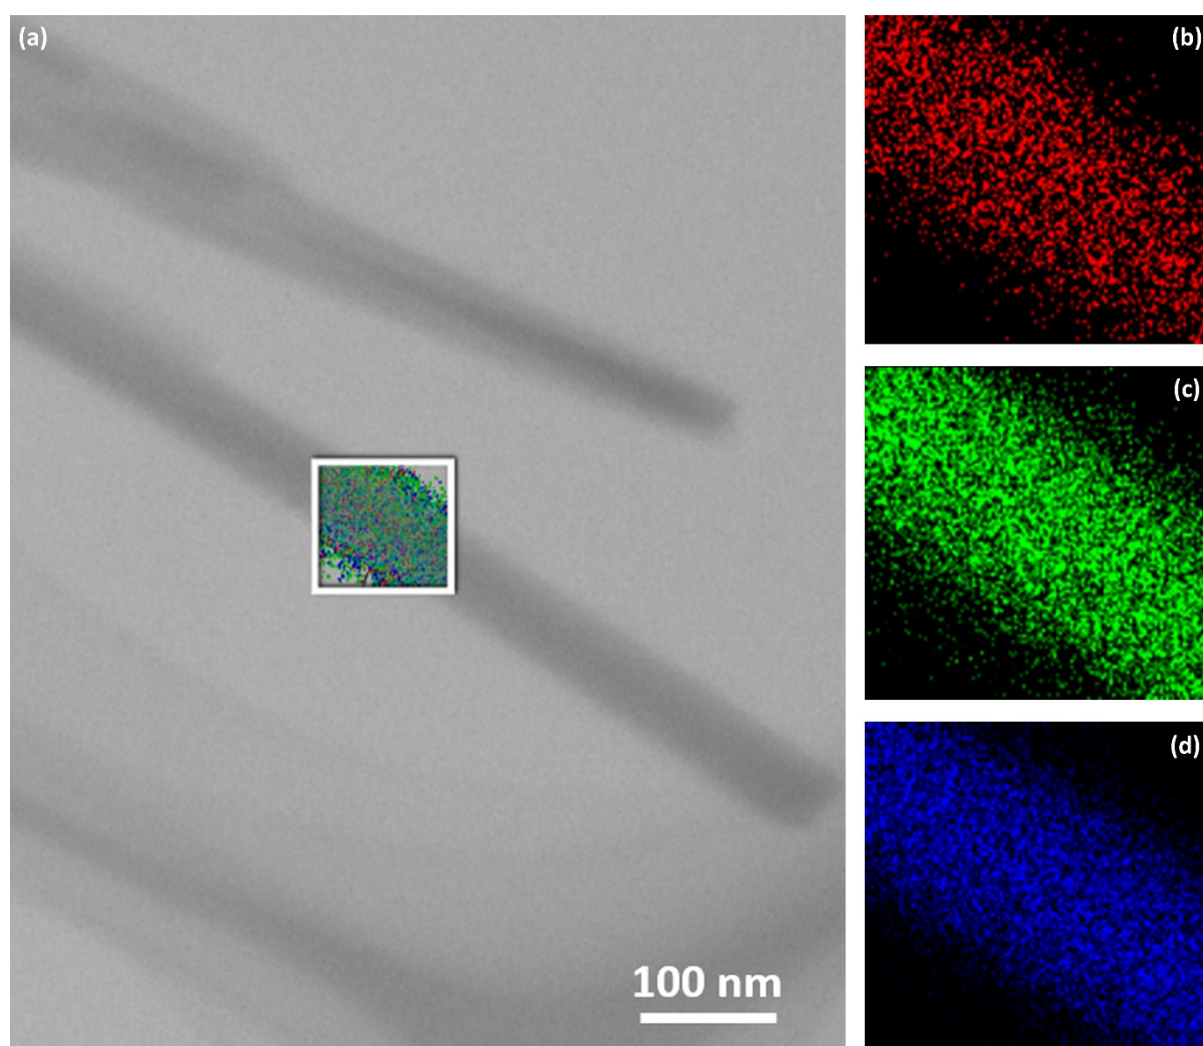

**Fig. S1** (a) TEM image of the NTO NWs. Elemental mapping of (b) Na, (c) O, and (d) Ti in the square area in (a).

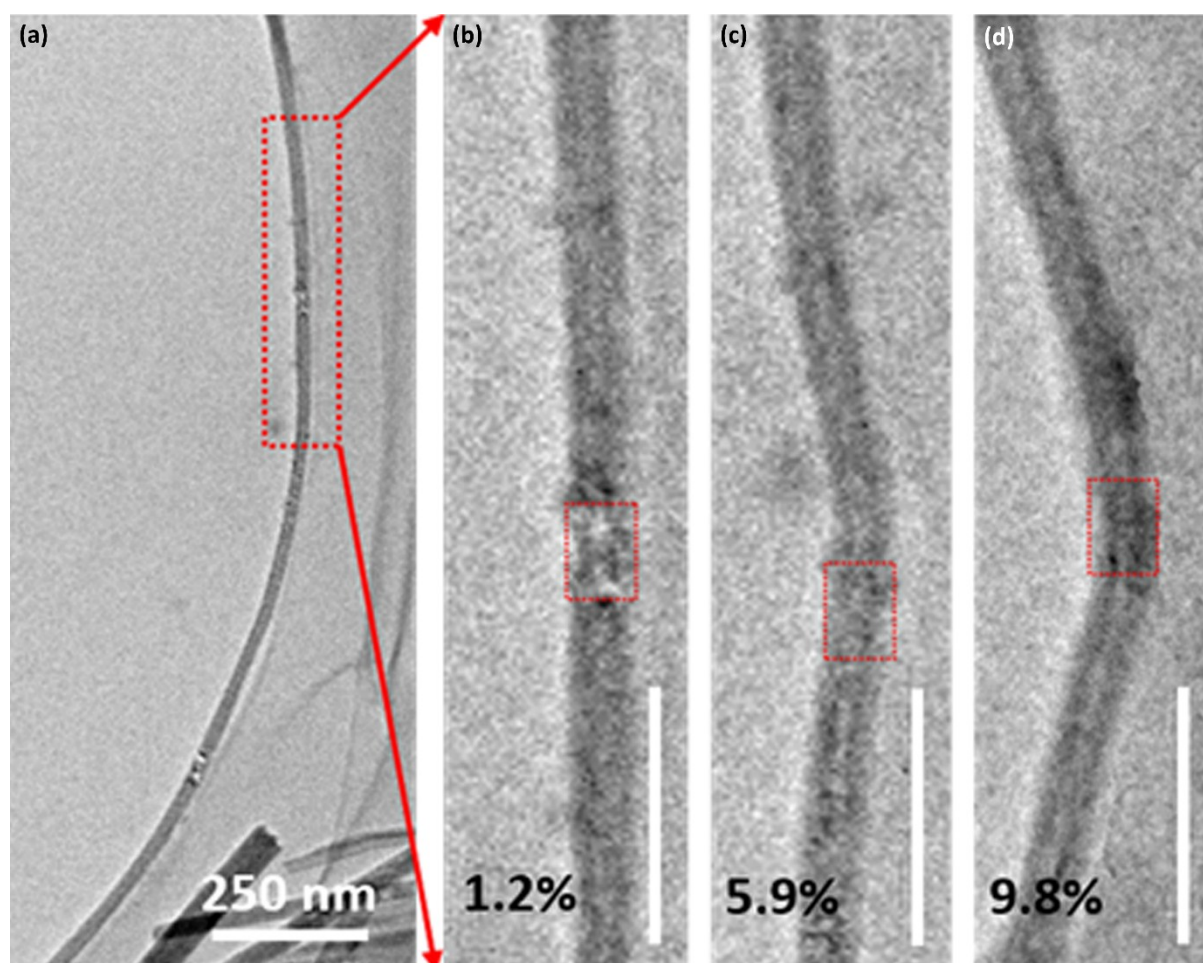

**Fig. S2** (a) low-magnified TEM image of a bent individual NW. TEM images illustrating the bending processes of the NW shown in (a): (b-c) With the strain of 1.2%, 5.9%, and 9.8%, respectively. The scale bars in (b-d) are 100 nm.

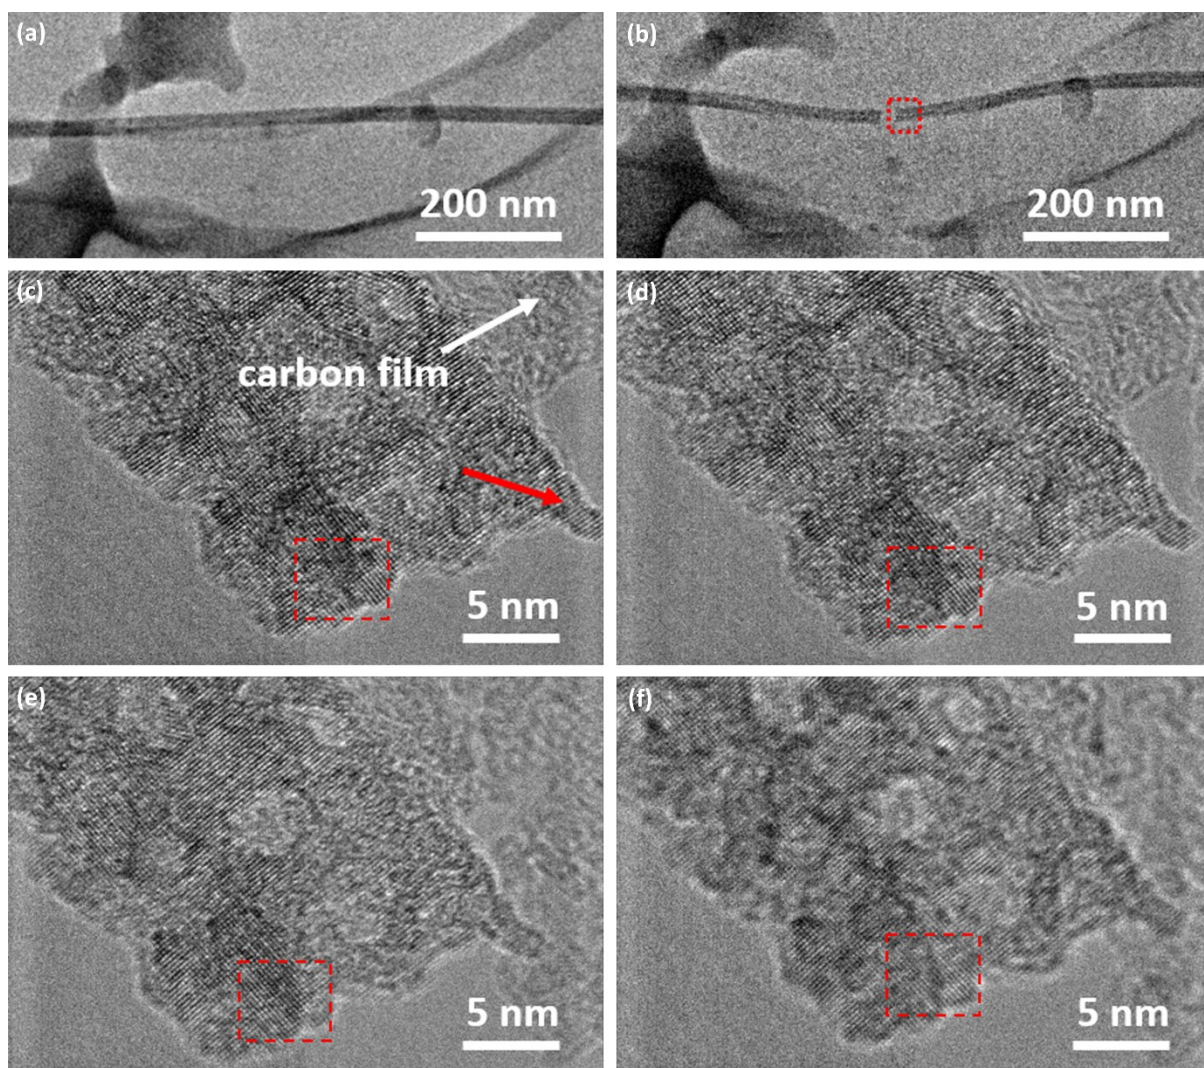

**Fig. S3** Low-magnified TEM images of an individual NW (a) before and (b) after fracture. (c-f) Mechanical deformation processes of near the fracture part marked by the box in (b).
